# Supplementary material
Source: publisher figshare collection journal article supplement (https://tandf.figshare.com/ndownloader/files/20073326)
Supplement: Supplementary file 1 [file 20073326]

## APPENDIX

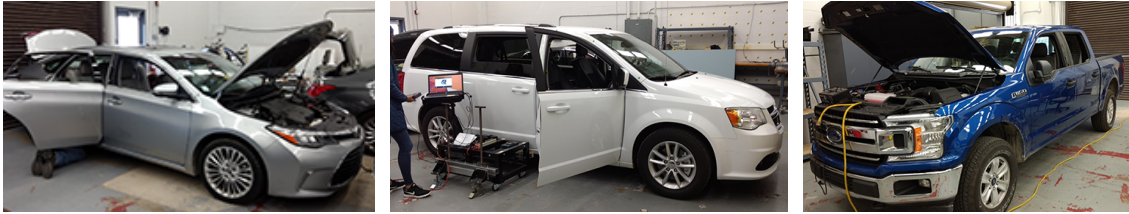

Figure A1. Test vehicles. From left, 2016 Toyota Avalon, 2018 Dodge Caravan, 2018 Ford F-150.

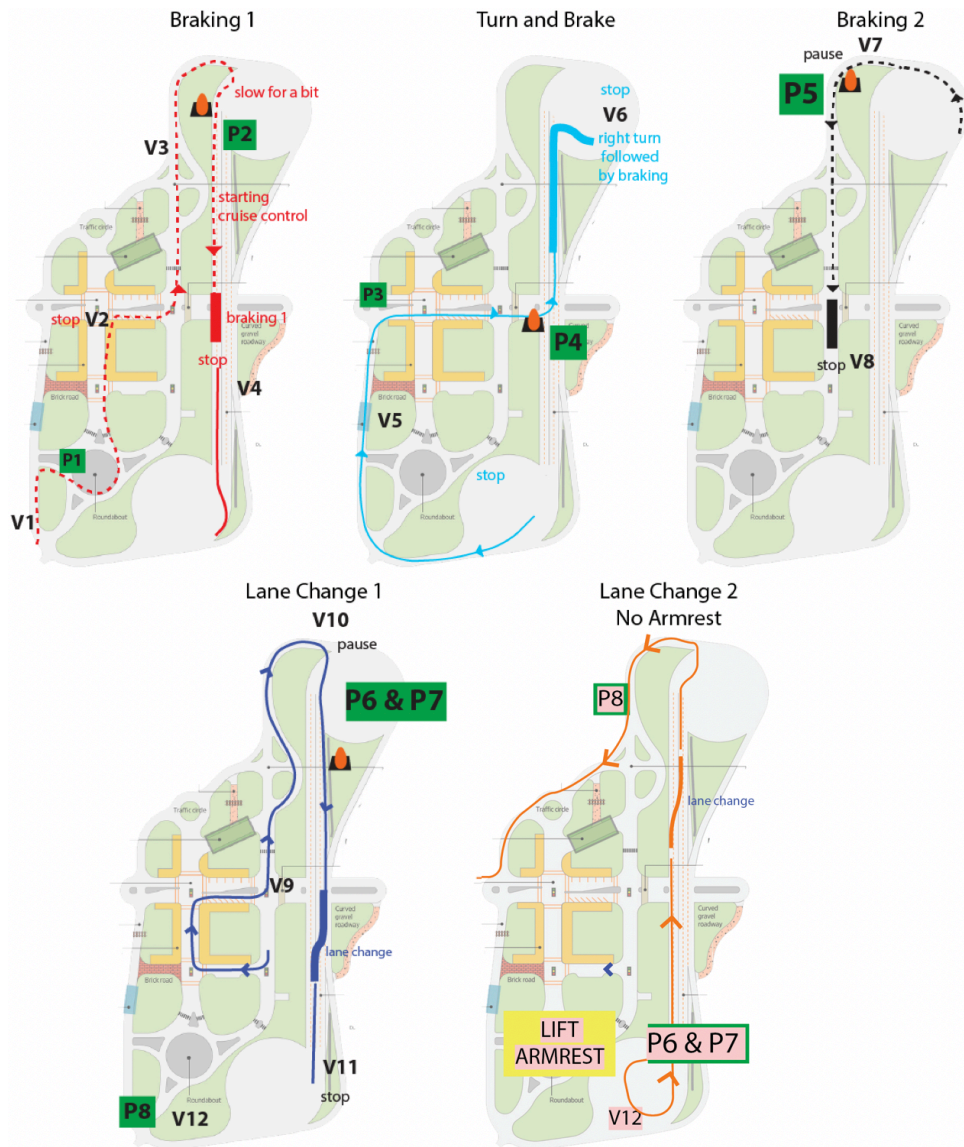

Figure A2. Vehicle route and event positions at Mcity. Events appear from left to right, top to bottom in the order in which they were presented.

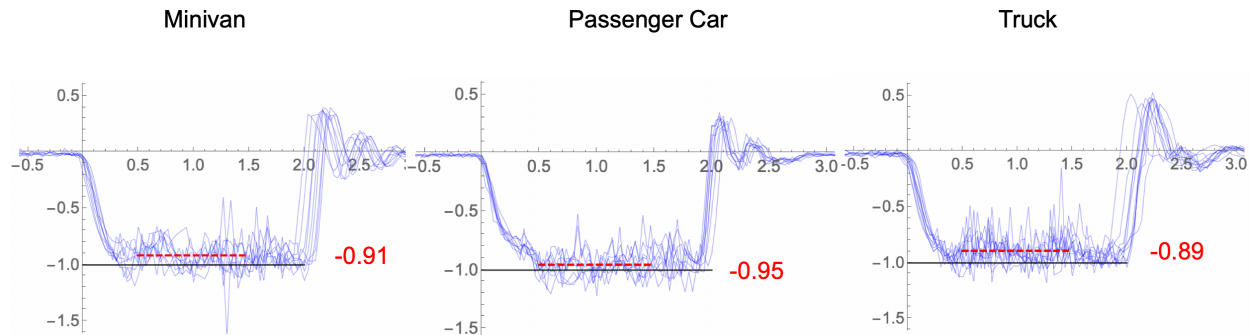

Figure A3. Vehicle longitudinal accelerations (g) during the first braking event. Mean values between 0.5 and 1.5 seconds are shown.

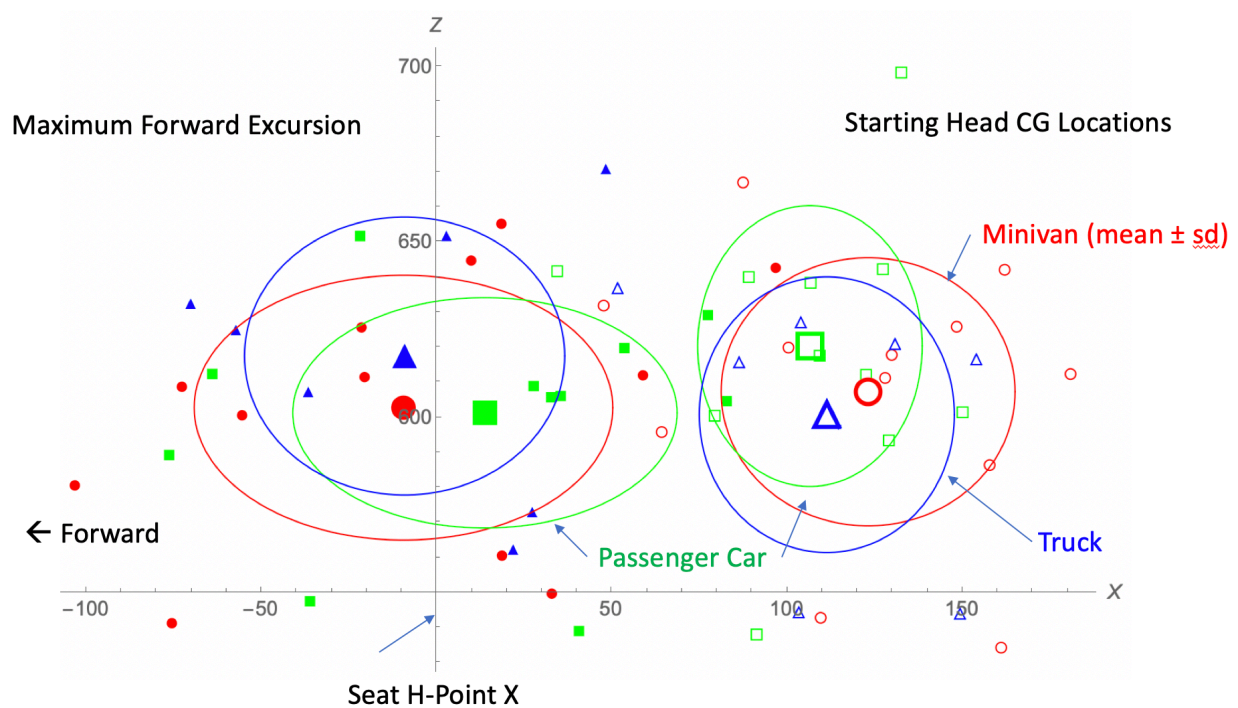

Figure A4. Head CG excursions in the **second** braking event (B2) in side view (mm). Head CG locations at the start of the event (open symbols) and at the point of maximum forward excursion (filled symbols) are shown for the truck (triangle), minivan (circle), and passenger car (square). The mean for each vehicle is shown with larger symbols. The ellipses for each vehicle have axes with length  $\pm$  one standard deviation on each axis.

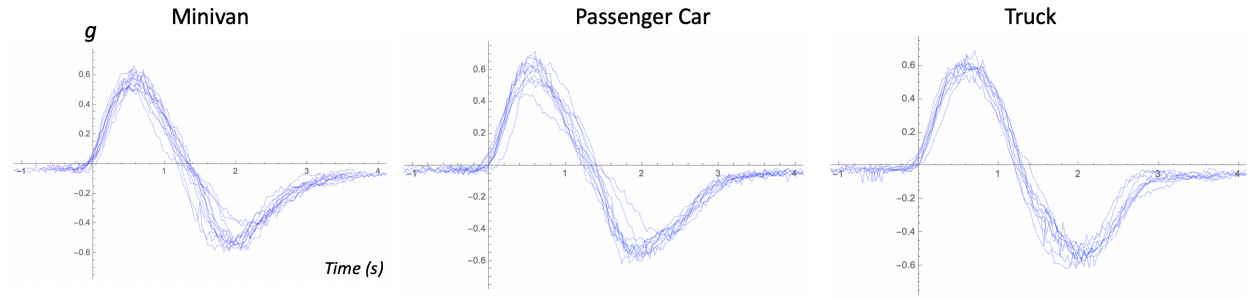

Figure A5. Vehicle lateral accelerations (g) during the first lane-change event.

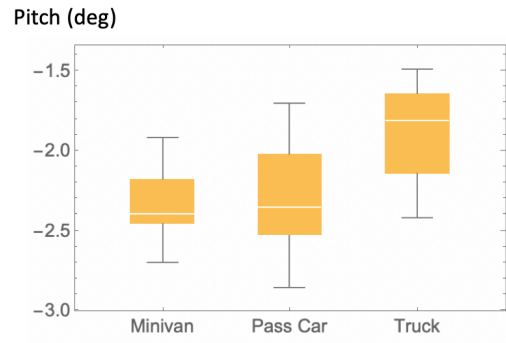

Figure A6. Box plot of vehicle pitch in braking events. Negative values indicate the front of the car is lower.

|             | IMU re HPt         |      |      | mean head location re HPt |      |      | IMU re mean head |          |     |          |
|-------------|--------------------|------|------|---------------------------|------|------|------------------|----------|-----|----------|
| Vehicle     | X                  | Y    | Z    | X                         | Y    | Z    | X                | Y        | Z   | Distance |
| Minivan     | 109                | -430 | -282 | 134                       | 7    | 627  | 25               | 437      | 909 | 1009     |
| Pass        | 119                | -371 | -104 | 122                       | -23  | 621  | 3                | 348      | 725 | 805      |
| Truck       | 62                 | -467 | -242 | 138                       | -6   | 627  | 76               | 461      | 869 | 986      |
| Column Mean | 96                 | -423 | -209 | 131                       | -7   | 625  | 35               | 415      | 834 | 933      |
|             |                    |      |      |                           |      |      |                  |          |     |          |
|             | delta re mean head |      |      | % re mean head            |      |      |                  |          |     |          |
| Vehicle     | X                  | Y    | Z    | Distance                  | X    | Y    | Z                | Distance |     |          |
| Minivan     | -10                | 22   | 75   | 76                        | -27% | 5%   | 9%               | 8%       |     |          |
| Pass        | -32                | -67  | -109 | -128                      | -91% | -16% | -13%             | -14%     |     |          |
| Truck       | 41                 | 45   | 34   | 53                        | 118% | 11%  | 4%               | 6%       |     |          |

Table A1. Comparison of IMU locations across vehicles (mm). The table shows the IMU location with respect to H-point and mean head location. The differences across vehicles in mm and percentage relative to the mean are also shown.
